# Supplementary material
Source: bioRxiv or medRxiv preprint supplement (https://www.biorxiv.org/highwire/filestream/3118/field_highwire_adjunct_files/1/007559-2.pdf)
Supplement: Supplementary file [file 007559-2.pdf]

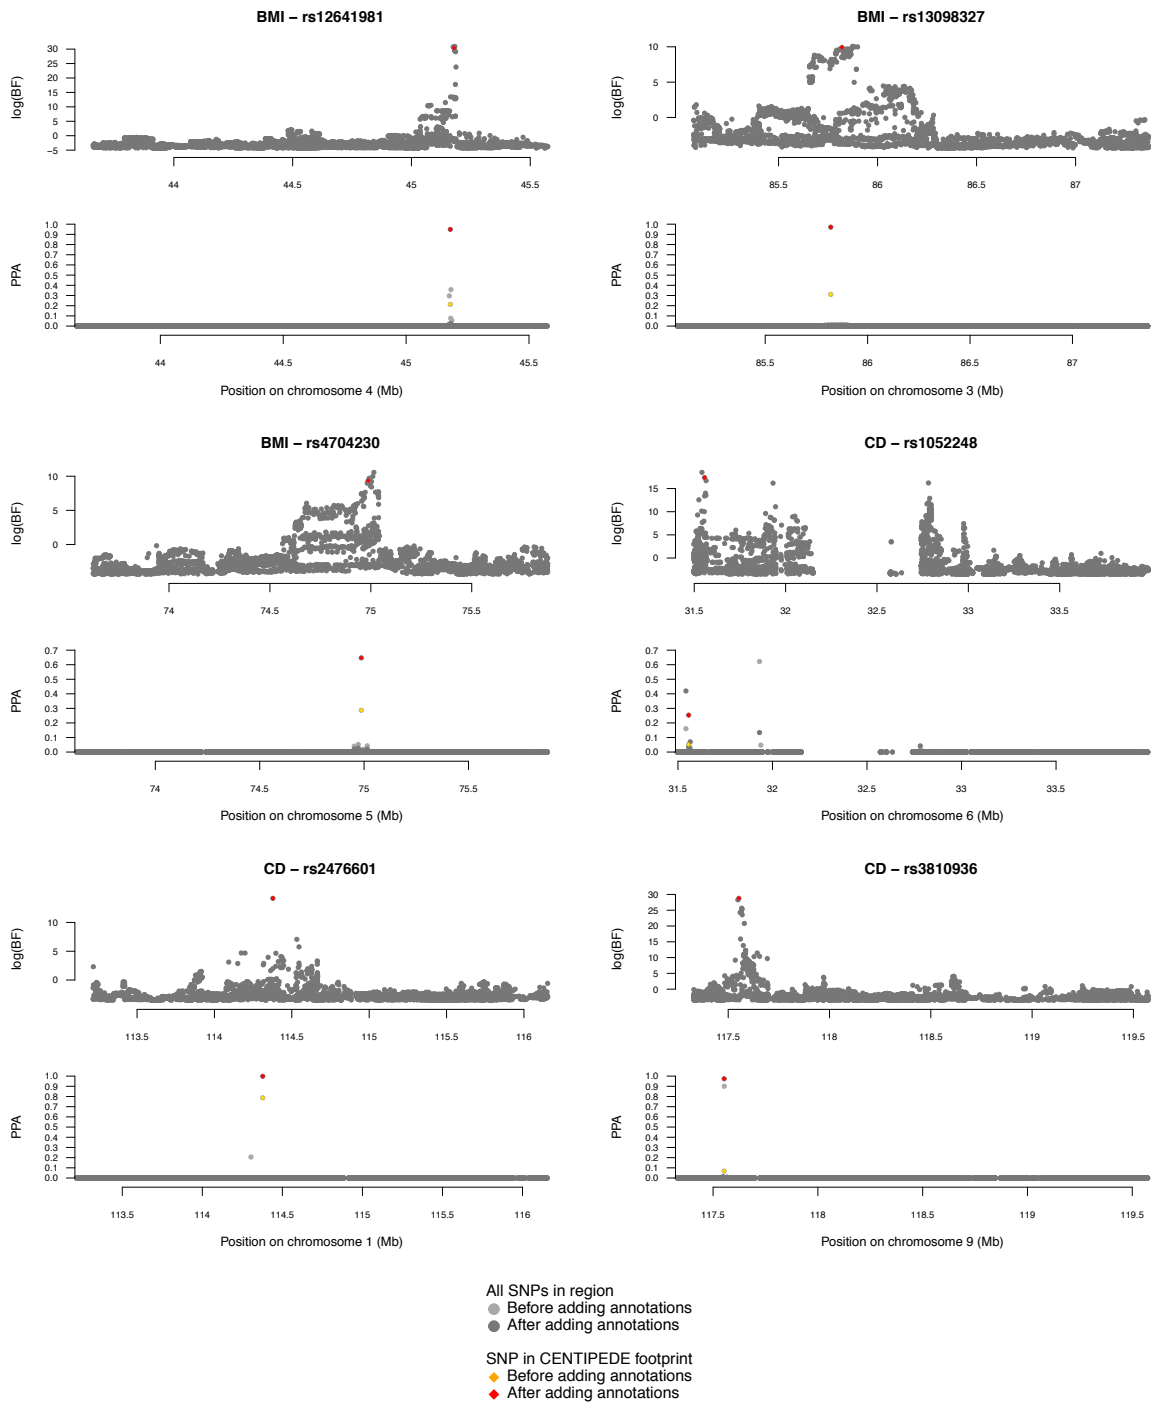

Figure S16: Association plots identifying SNPs in footprints from fgwas. For each SNP in Table S13, two plots show the log Bayes factor (top) and posterior probabilities (bottom) of association to the indicated trait for all genetic variants in the region containing the SNP. This Figure continues to next page ...

Figure S16 ... continued from previous page

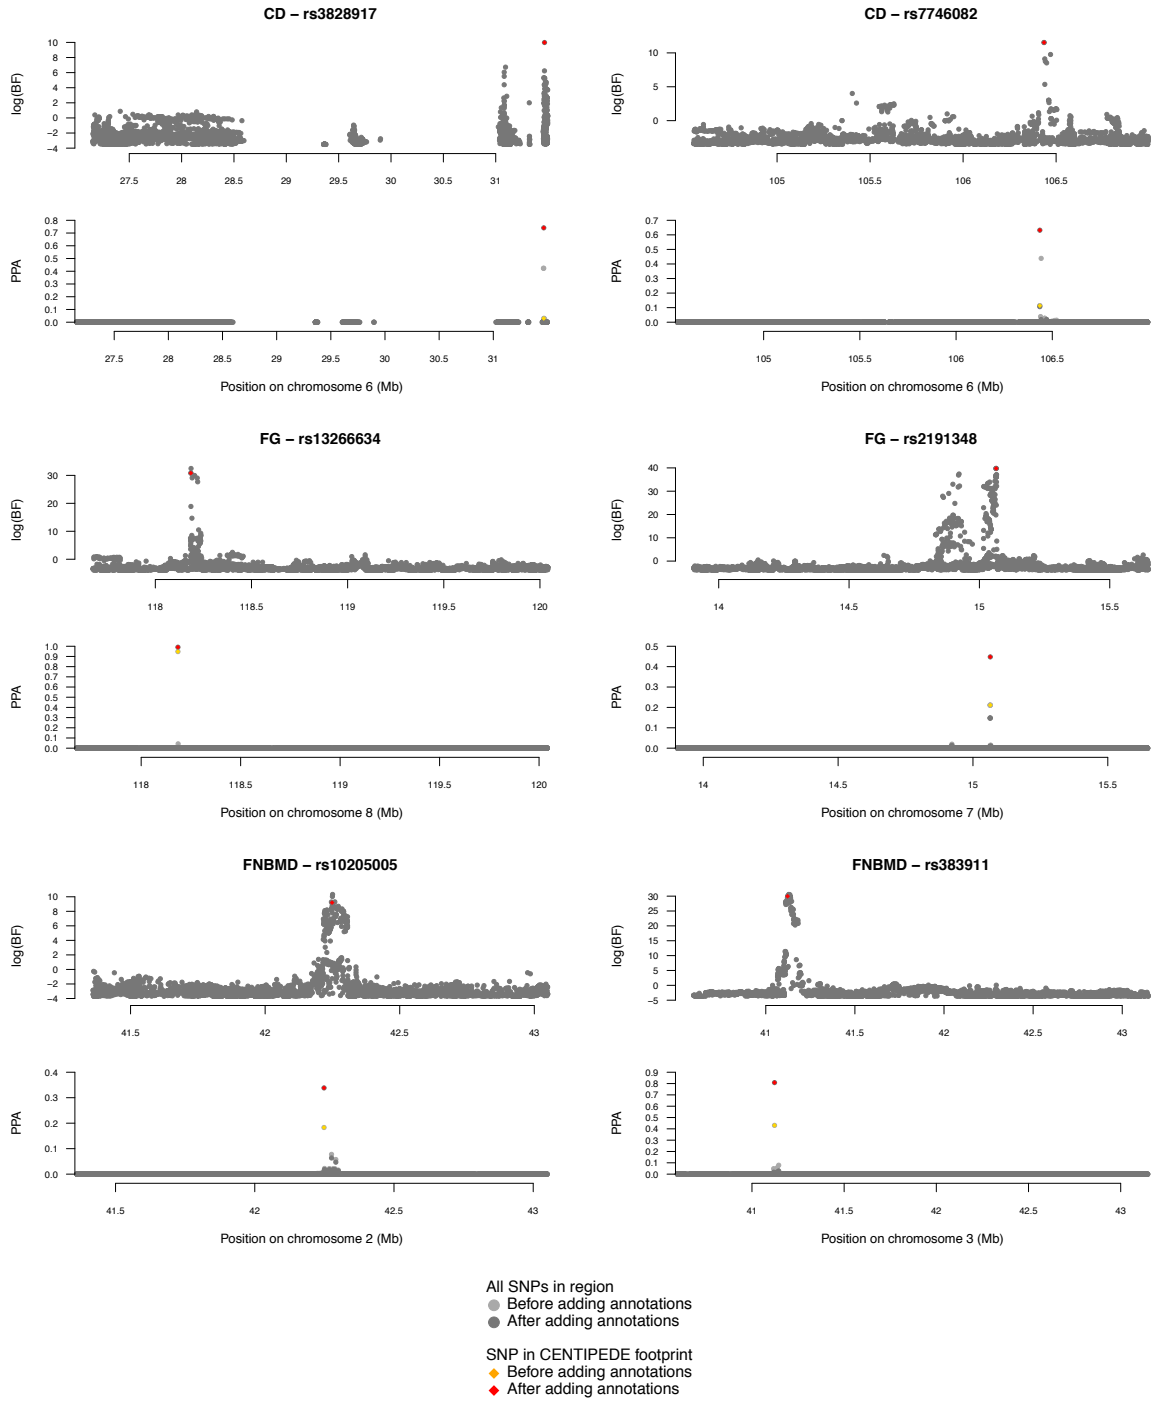

Figure S16 continues to next page ...

Figure S16 . . . continued from previous page

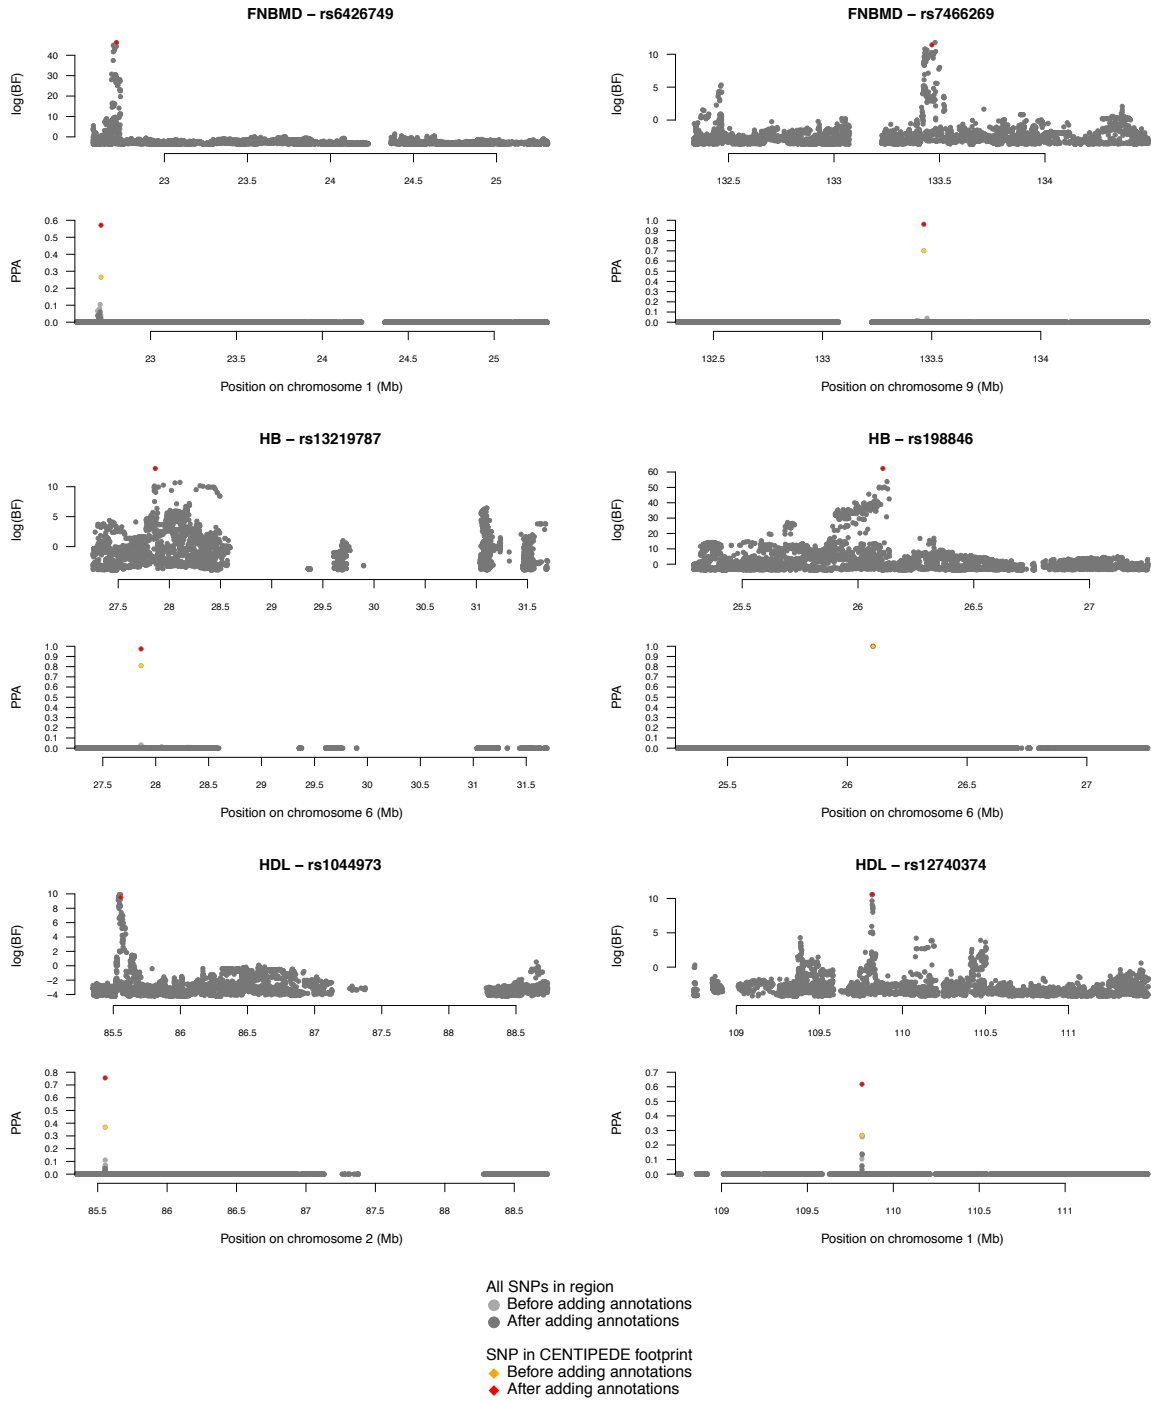

Figure S16 continues to next page . . .

Figure S16 . . . continued from previous page

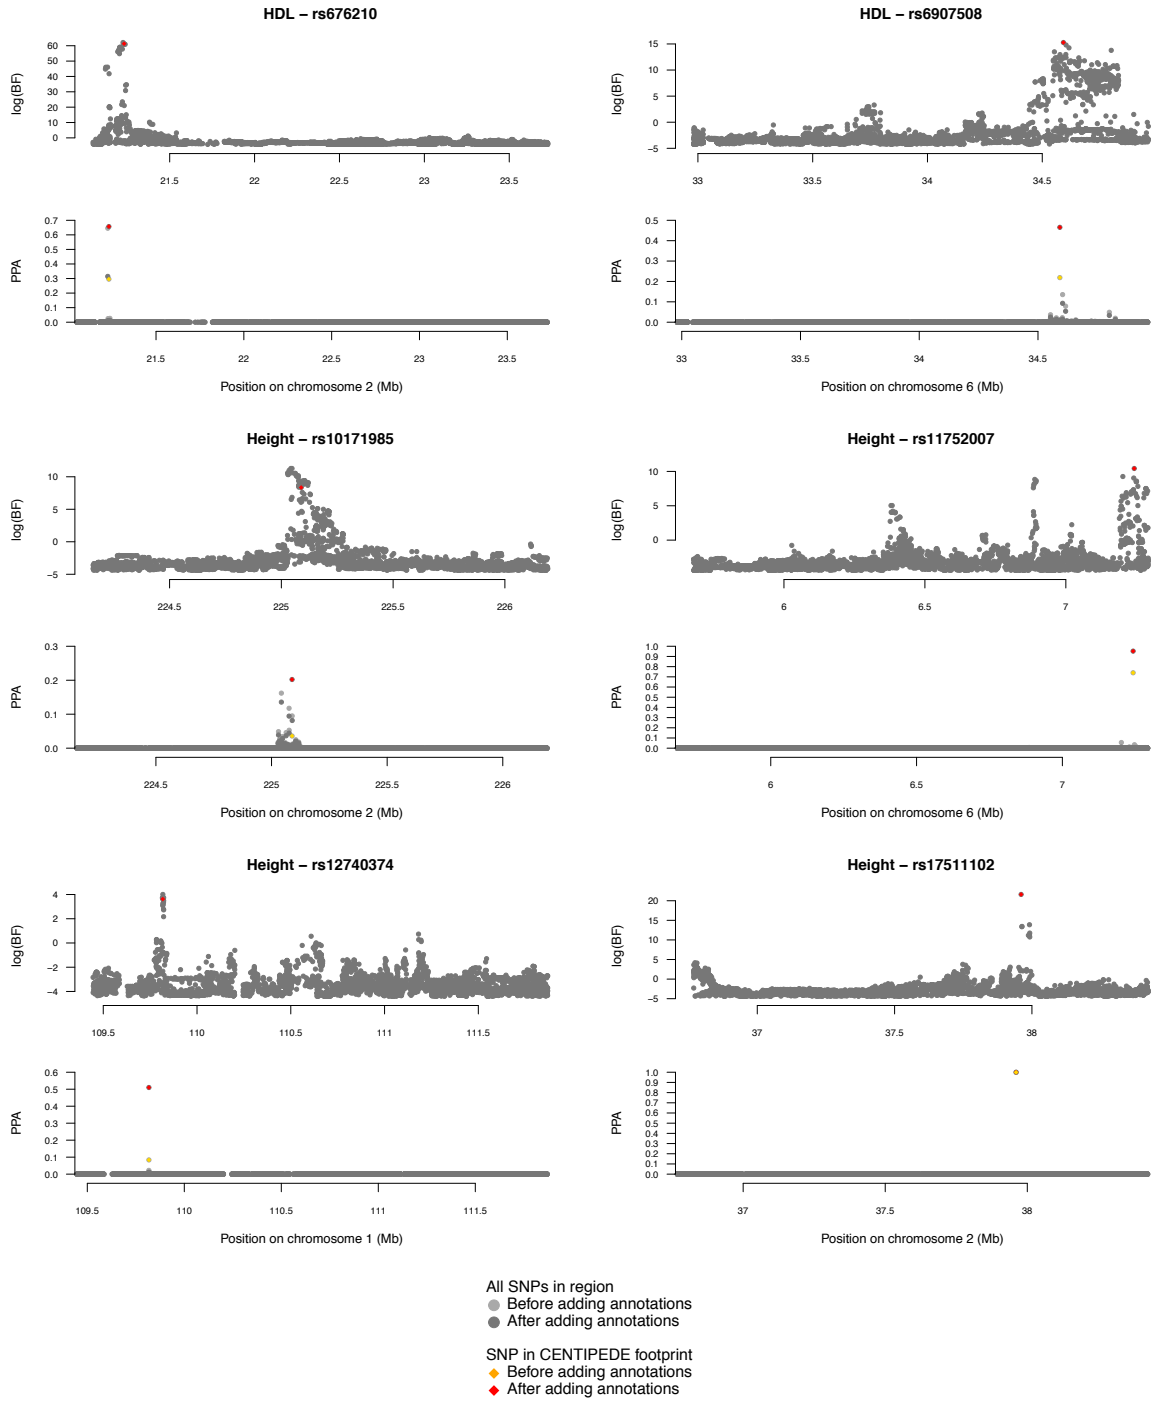

Figure S16 continues to next page . . .



Figure S16 . . . continued from previous page

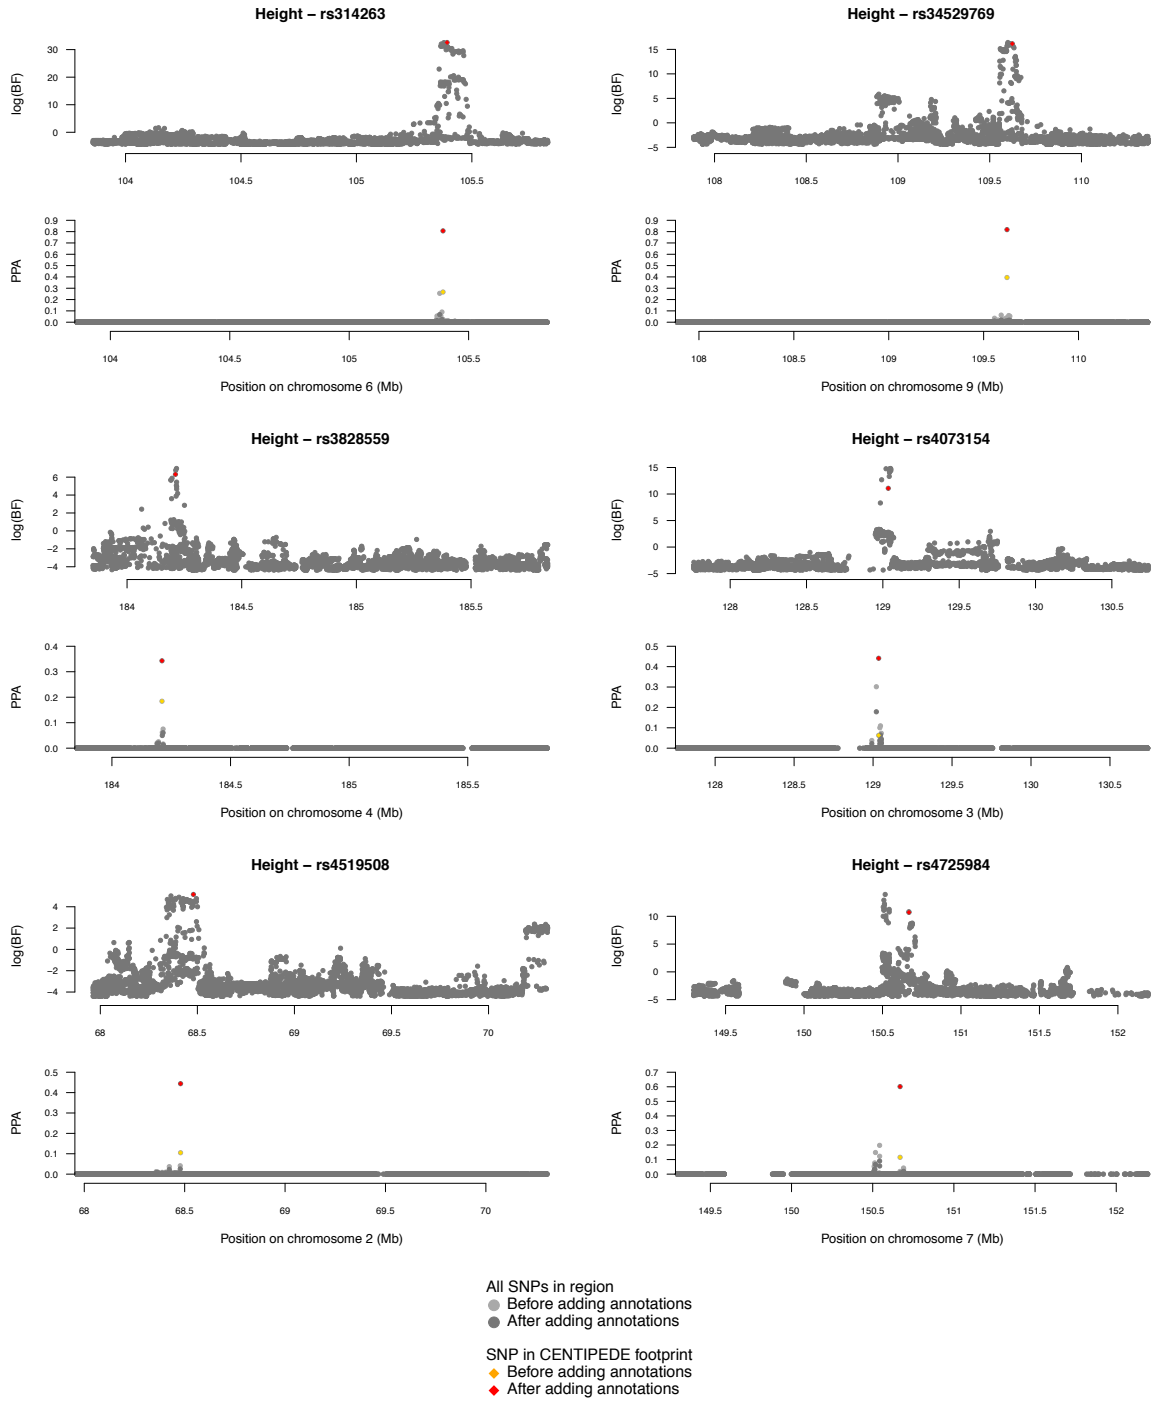

Figure S16 continues to next page . . .

Figure S16 . . . continued from previous page

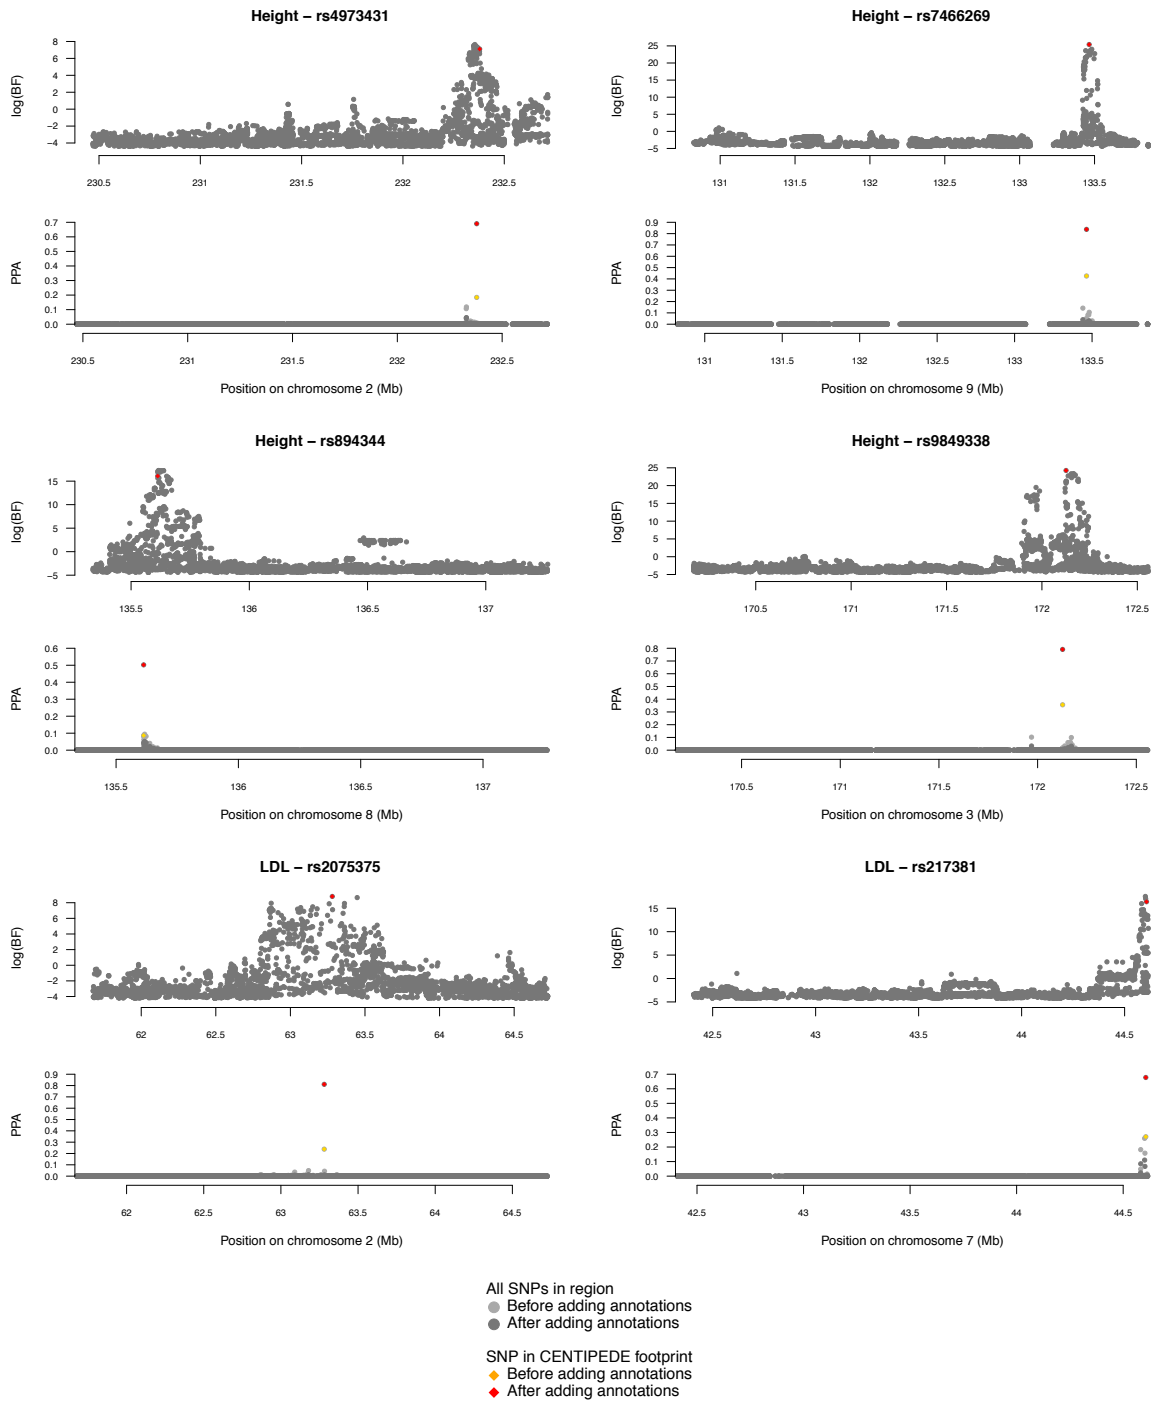

Figure S16 continues to next page . . .

Figure S16 . . . continued from previous page

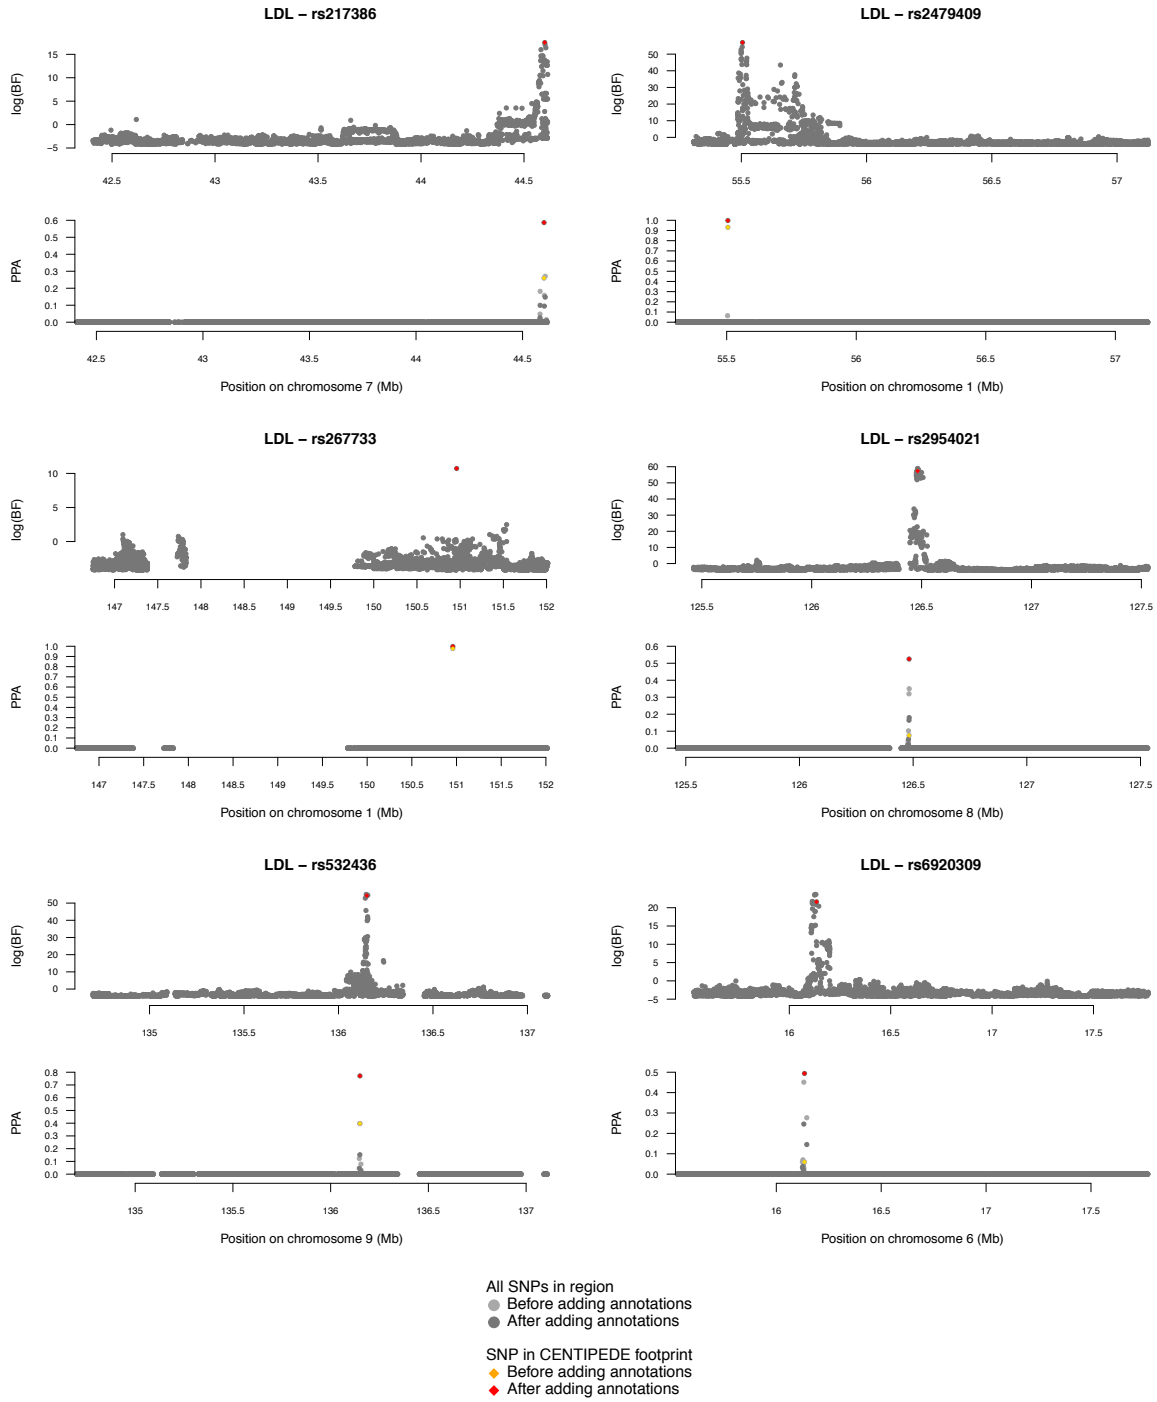

Figure S16 continues to next page . . .

Figure S16 . . . continued from previous page

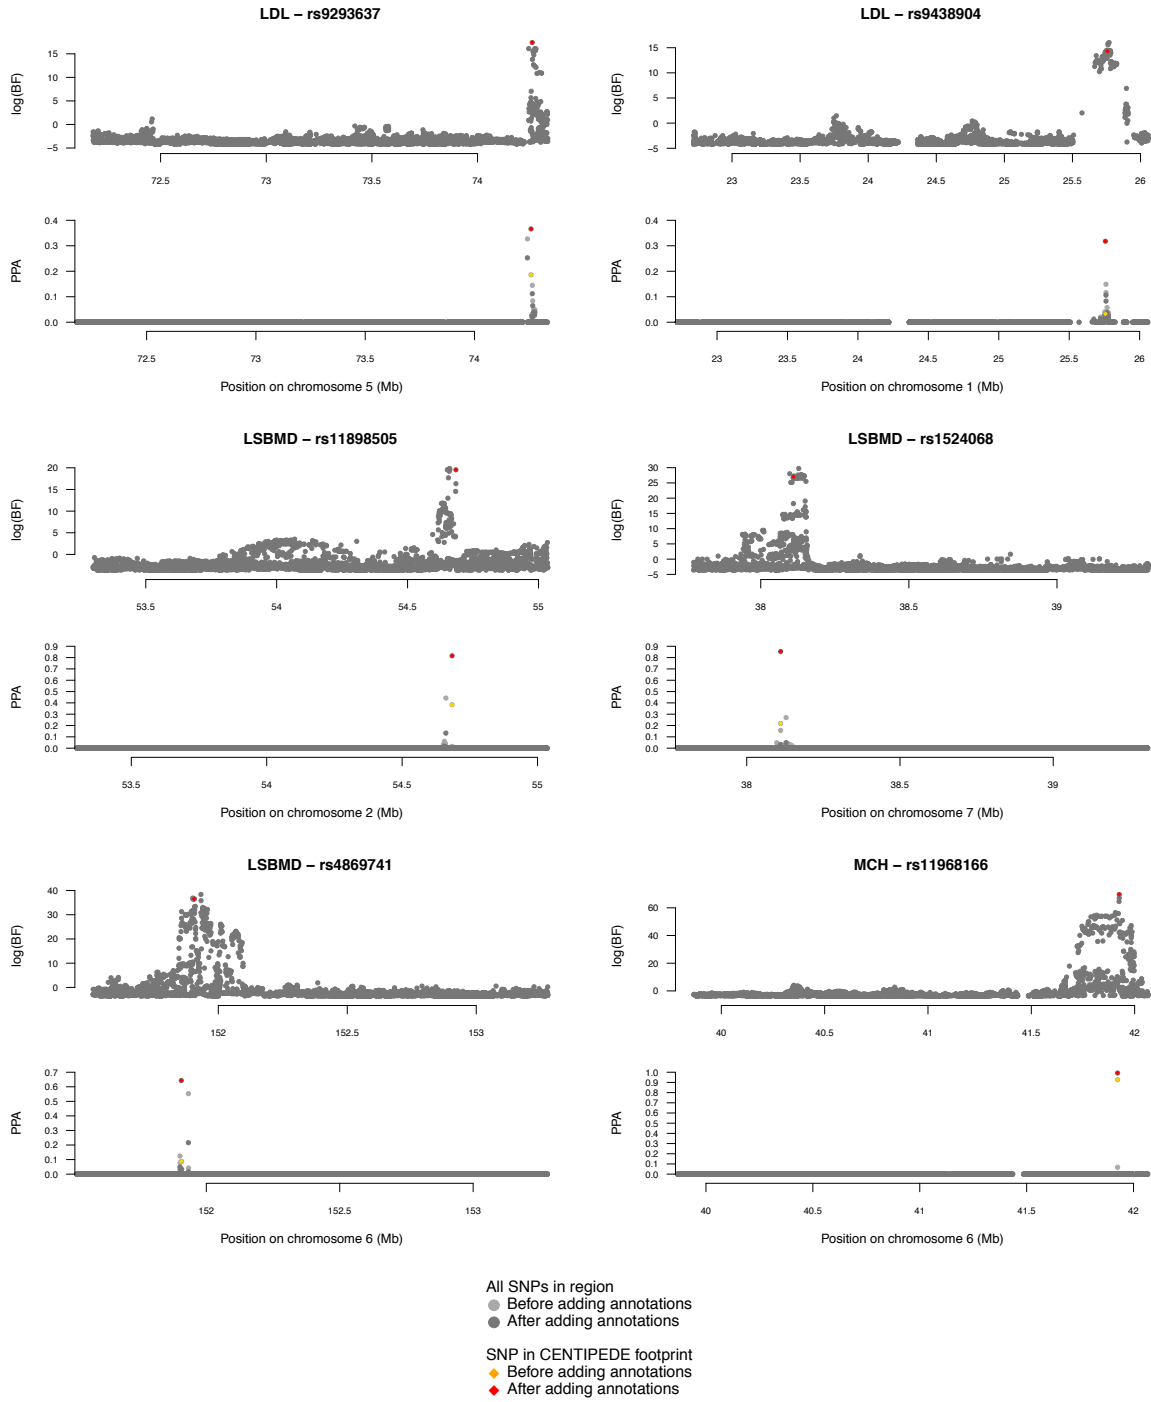

Figure S16 continues to next page . . .

Figure S16 . . . continued from previous page

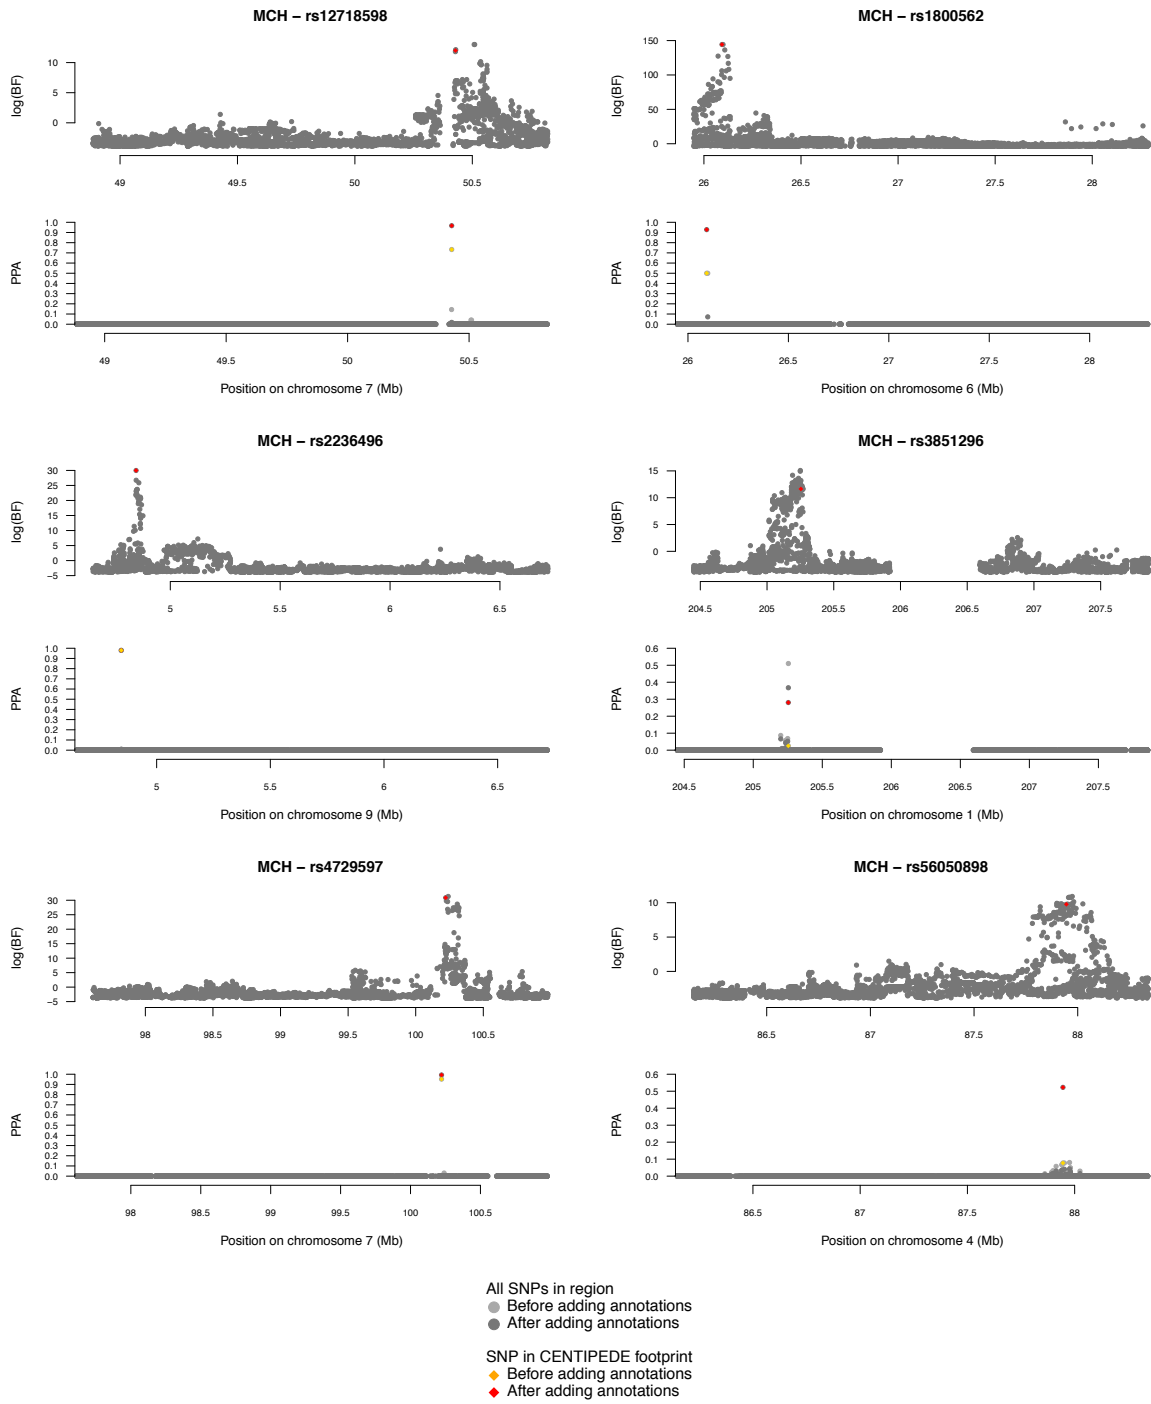

Figure S16 continues to next page . . .

Figure S16 . . . continued from previous page

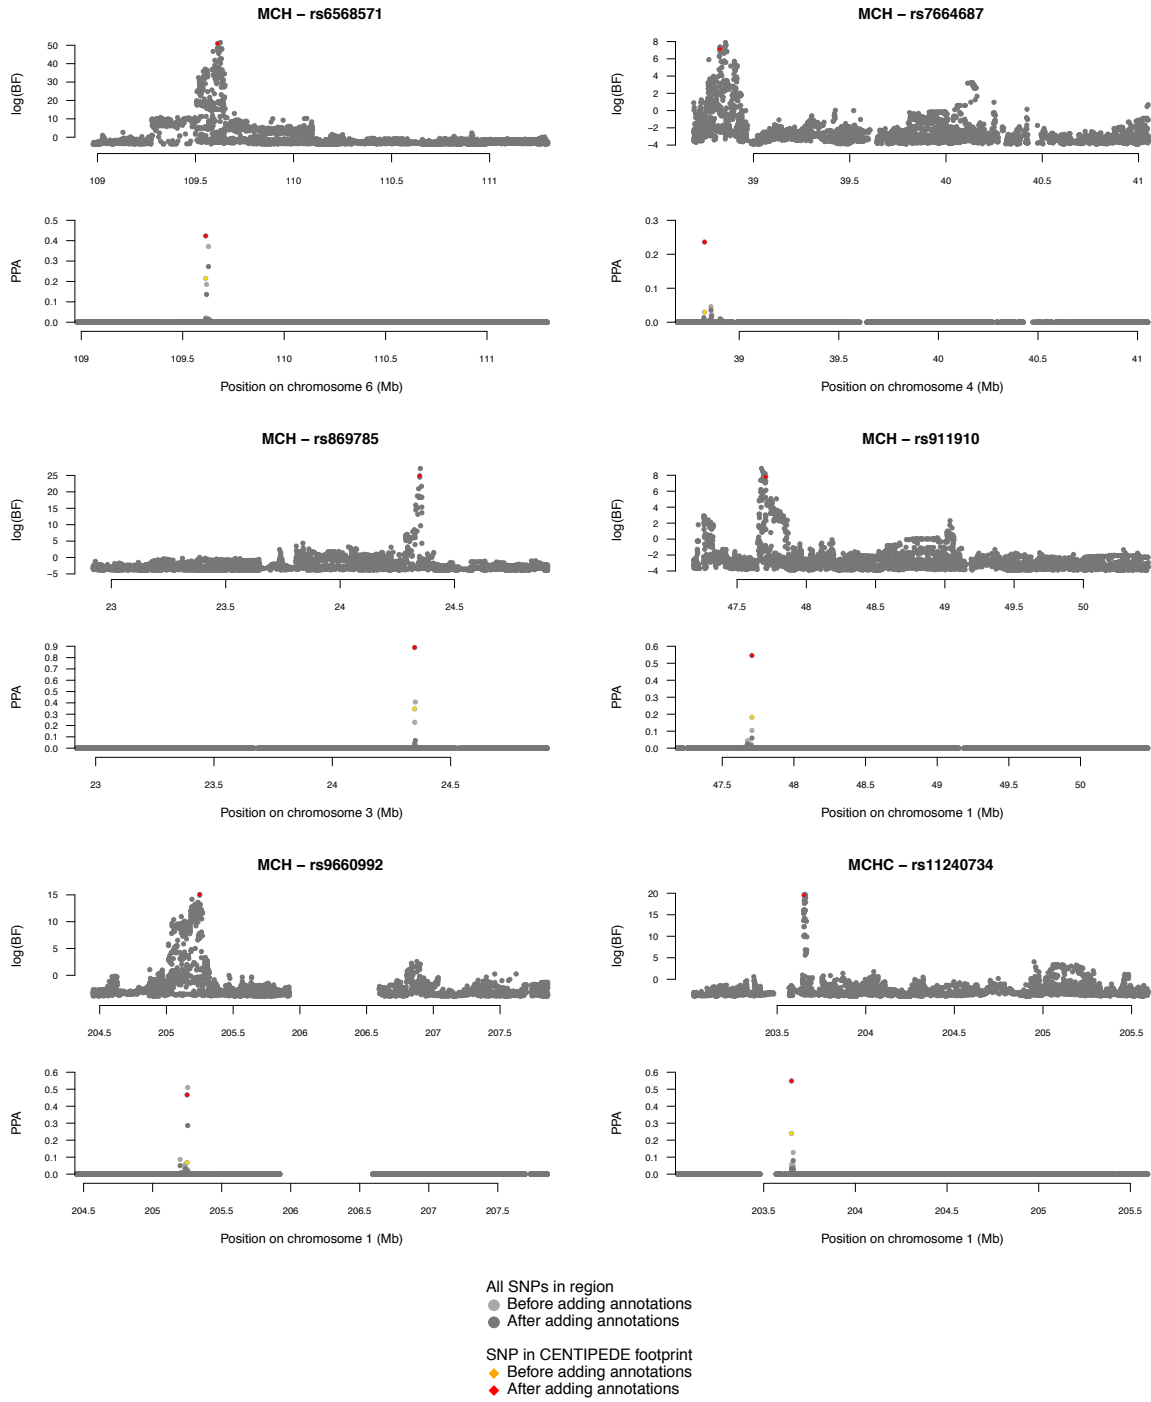

Figure S16 continues to next page . . .

Figure S16 ... continued from previous page

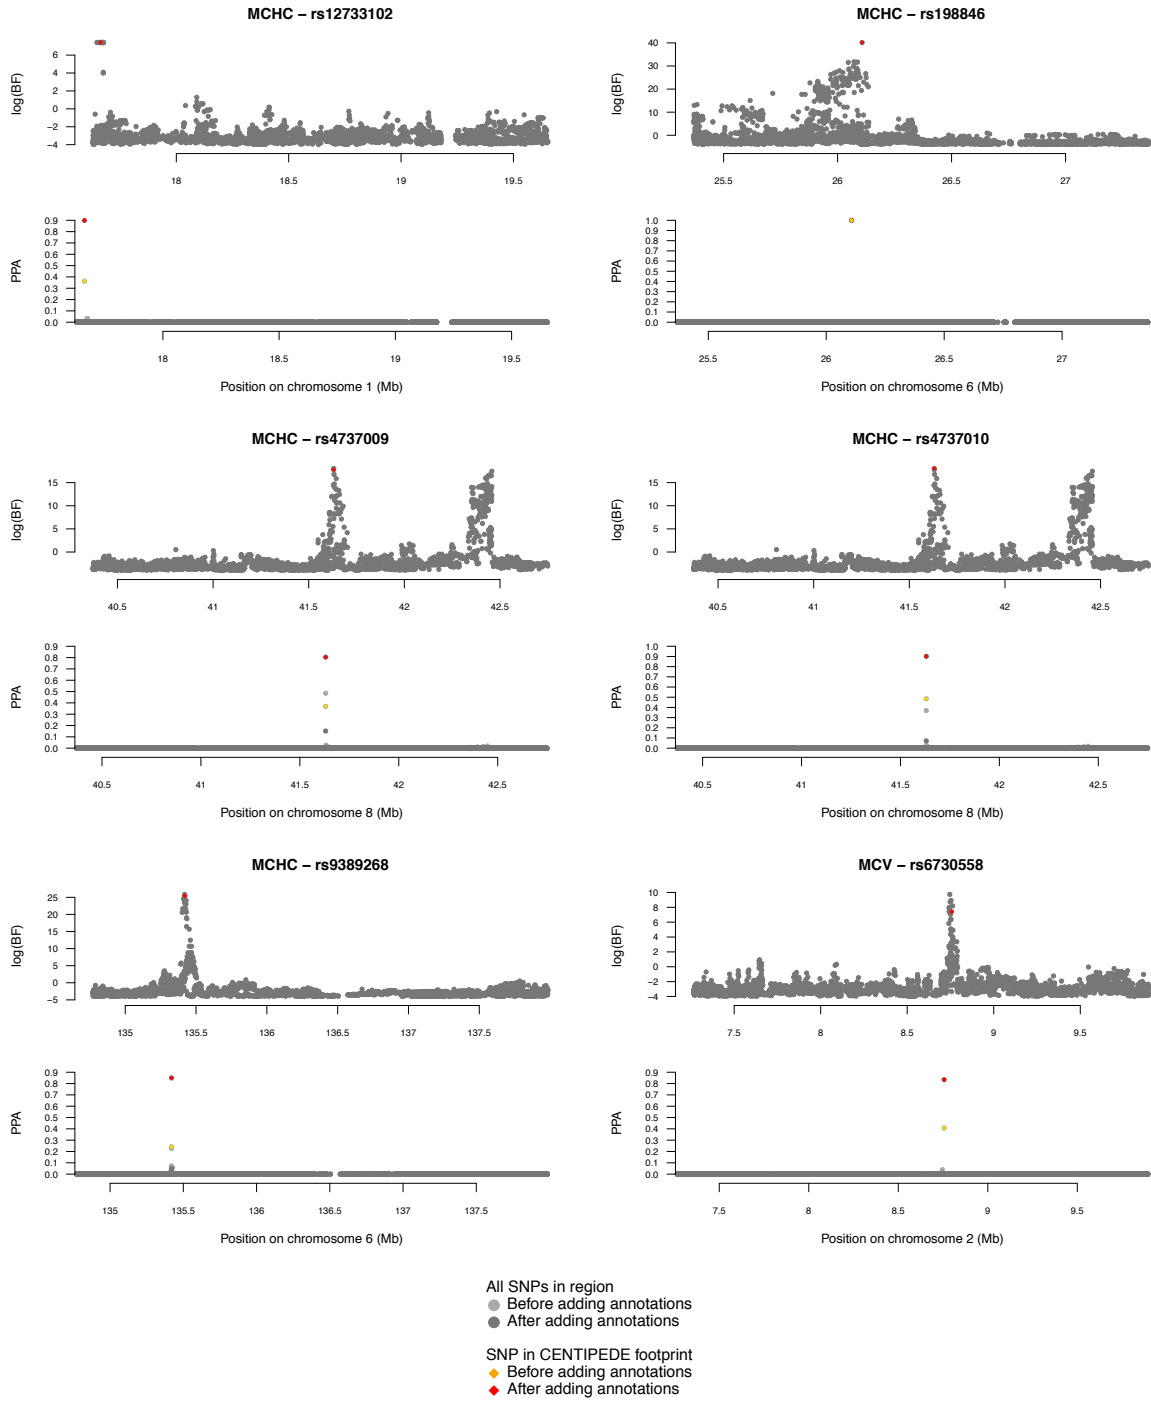

Figure S16 continues to next page ...

Figure S16 . . . continued from previous page

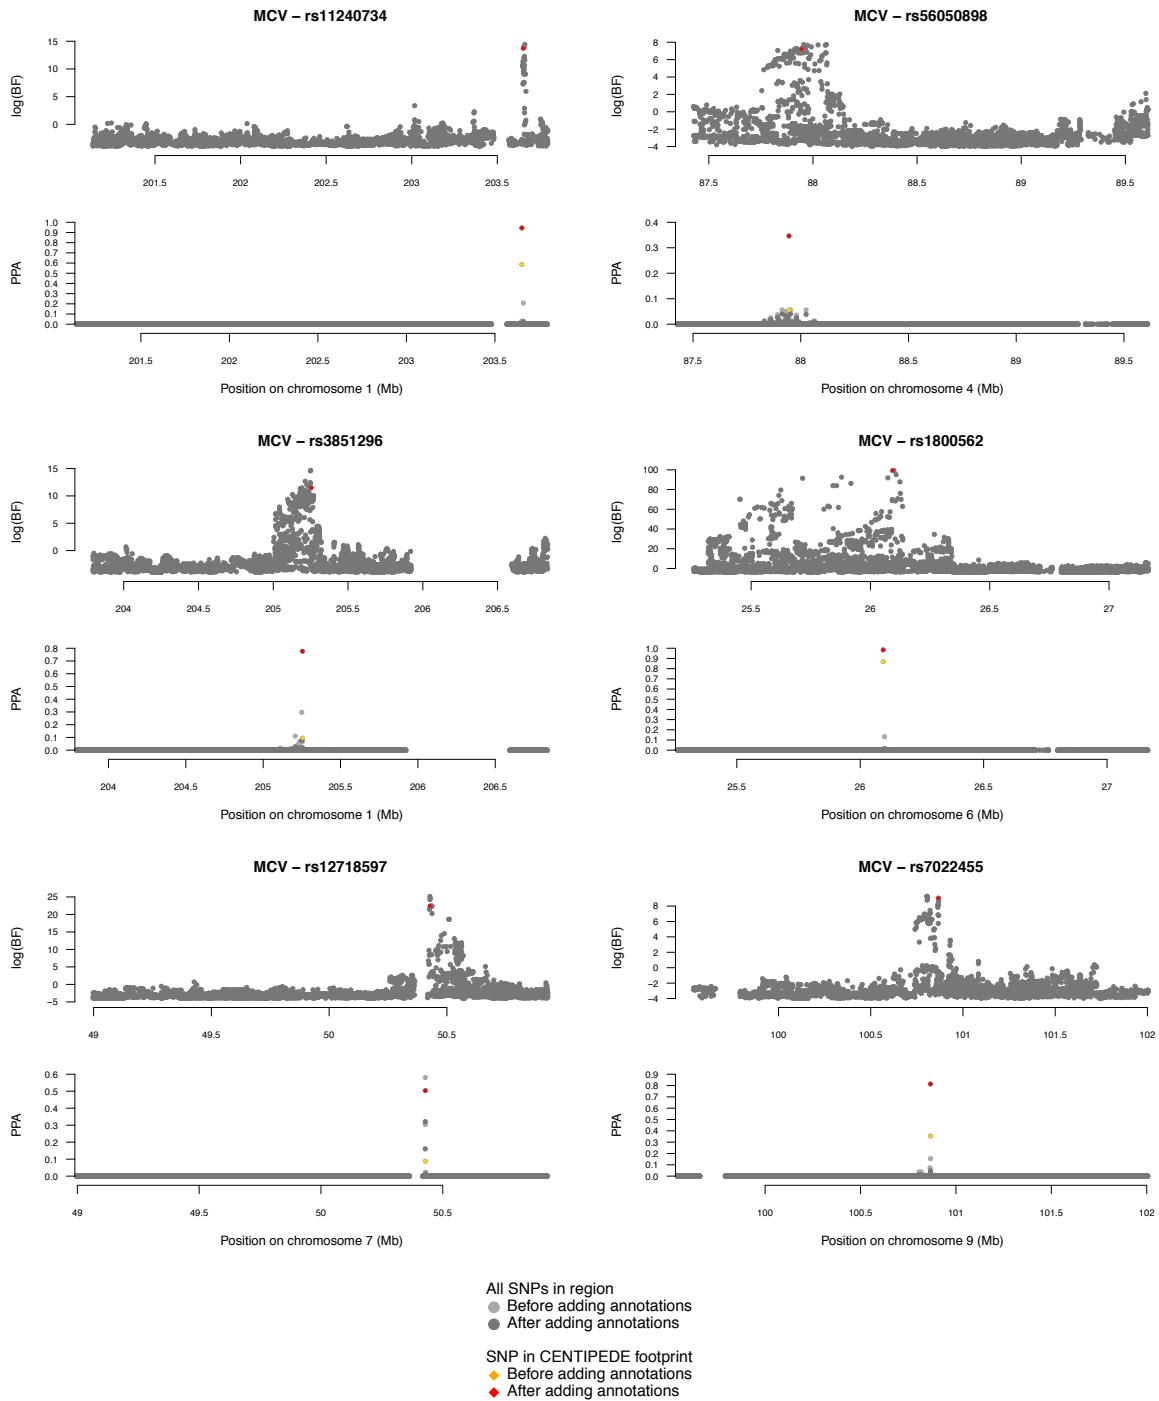

Figure S16 continues to next page . . .



Figure S16 . . . continued from previous page

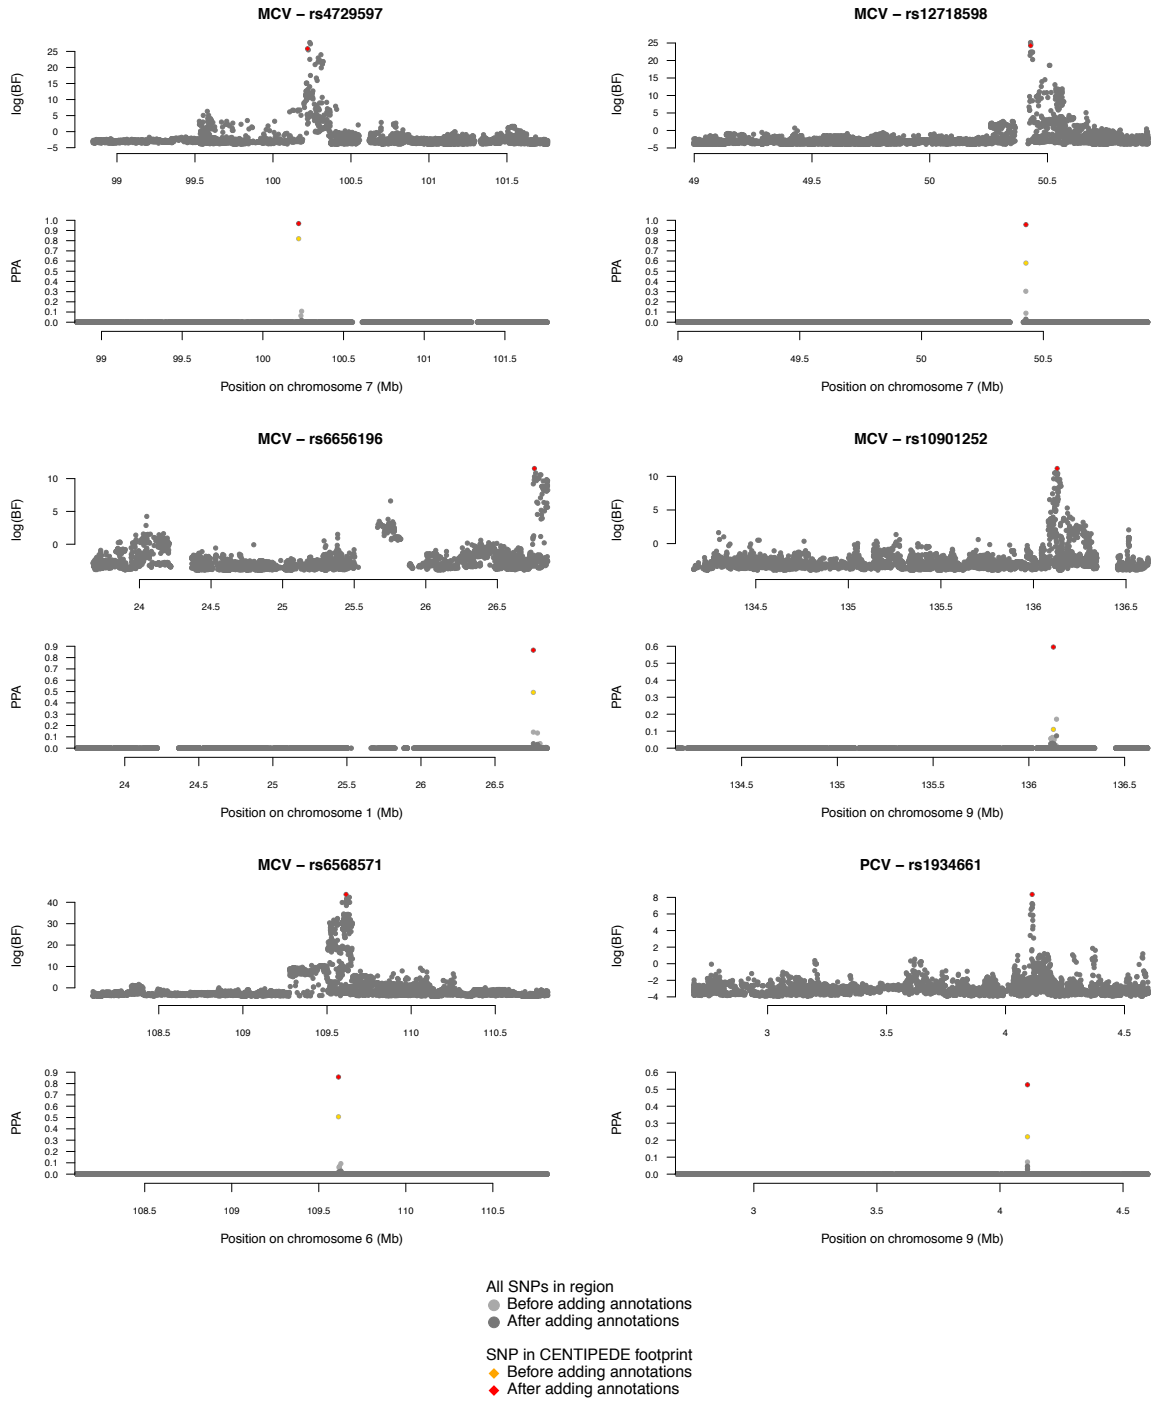

Figure S16 continues to next page . . .

Figure S16 . . . continued from previous page

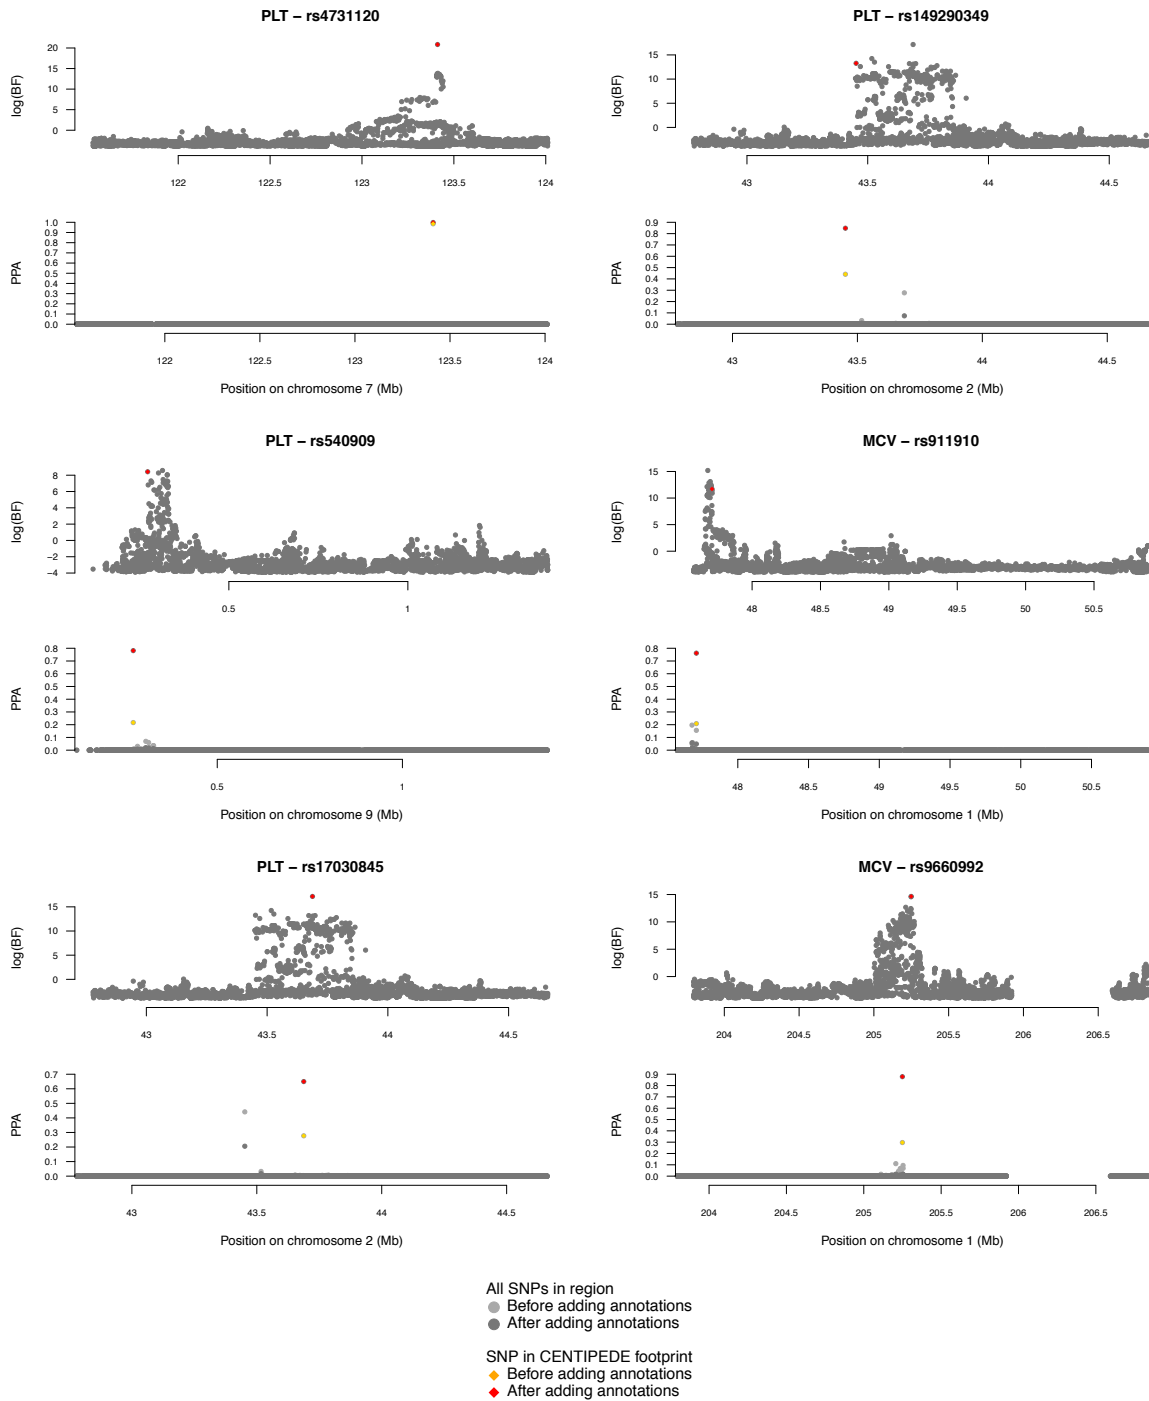

Figure S16 continues to next page . . .

Figure S16 ... continued from previous page

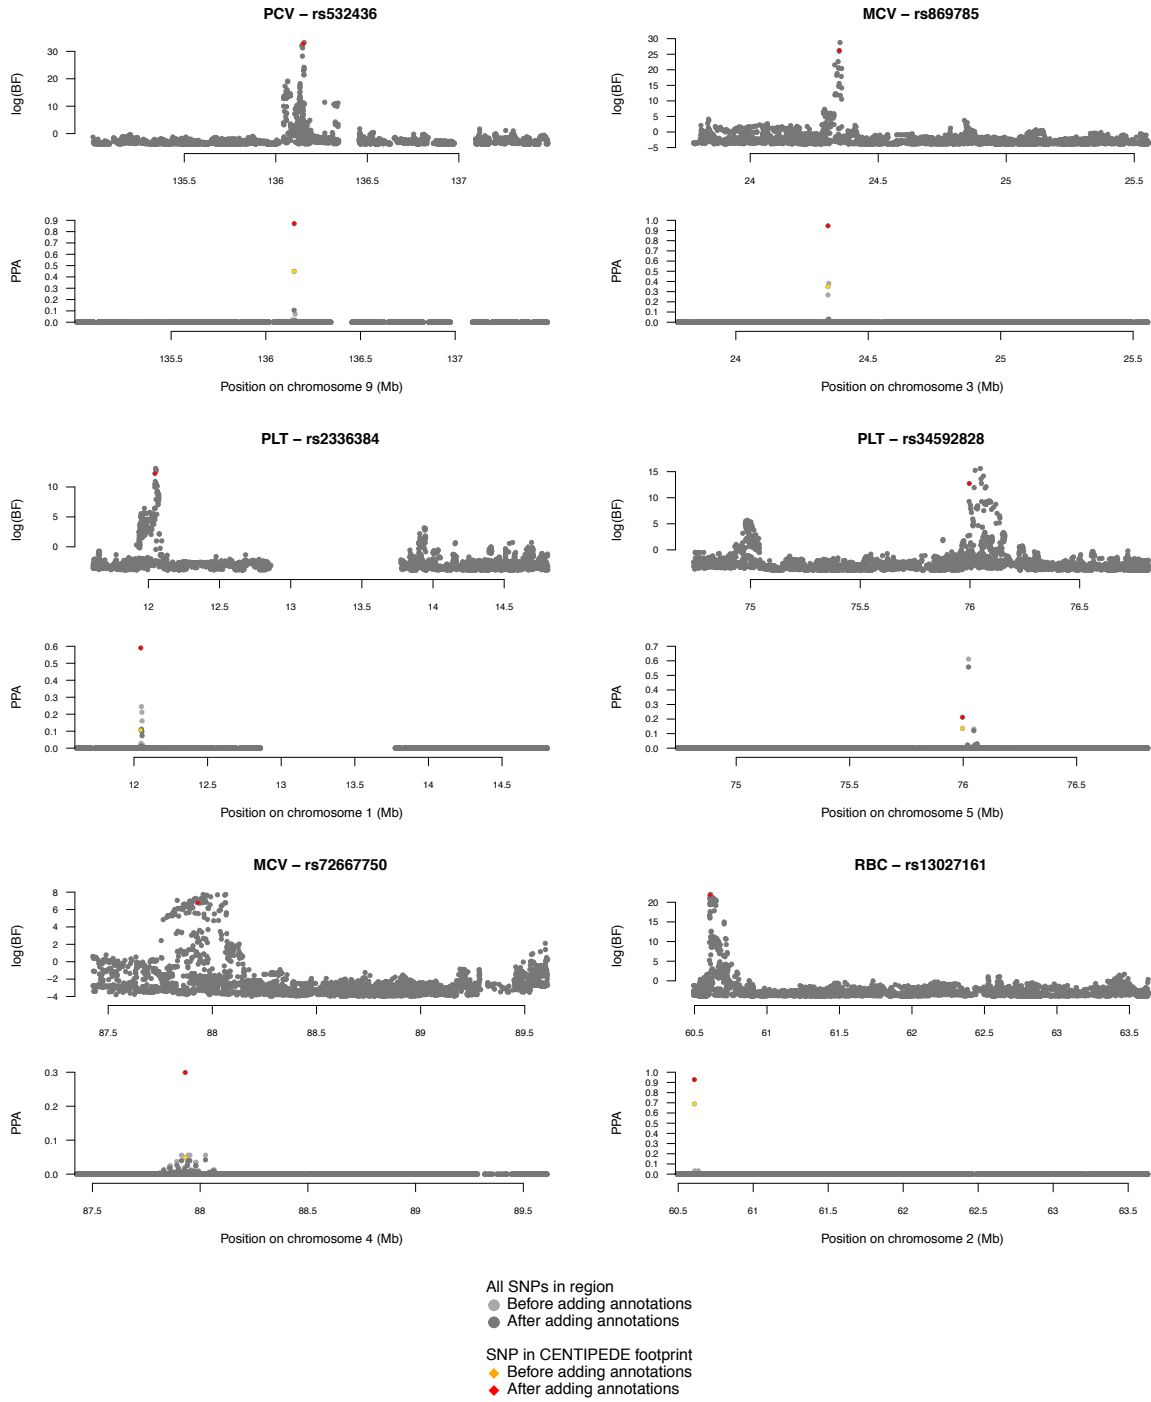

Figure S16 continues to next page ...

Figure S16 . . . continued from previous page

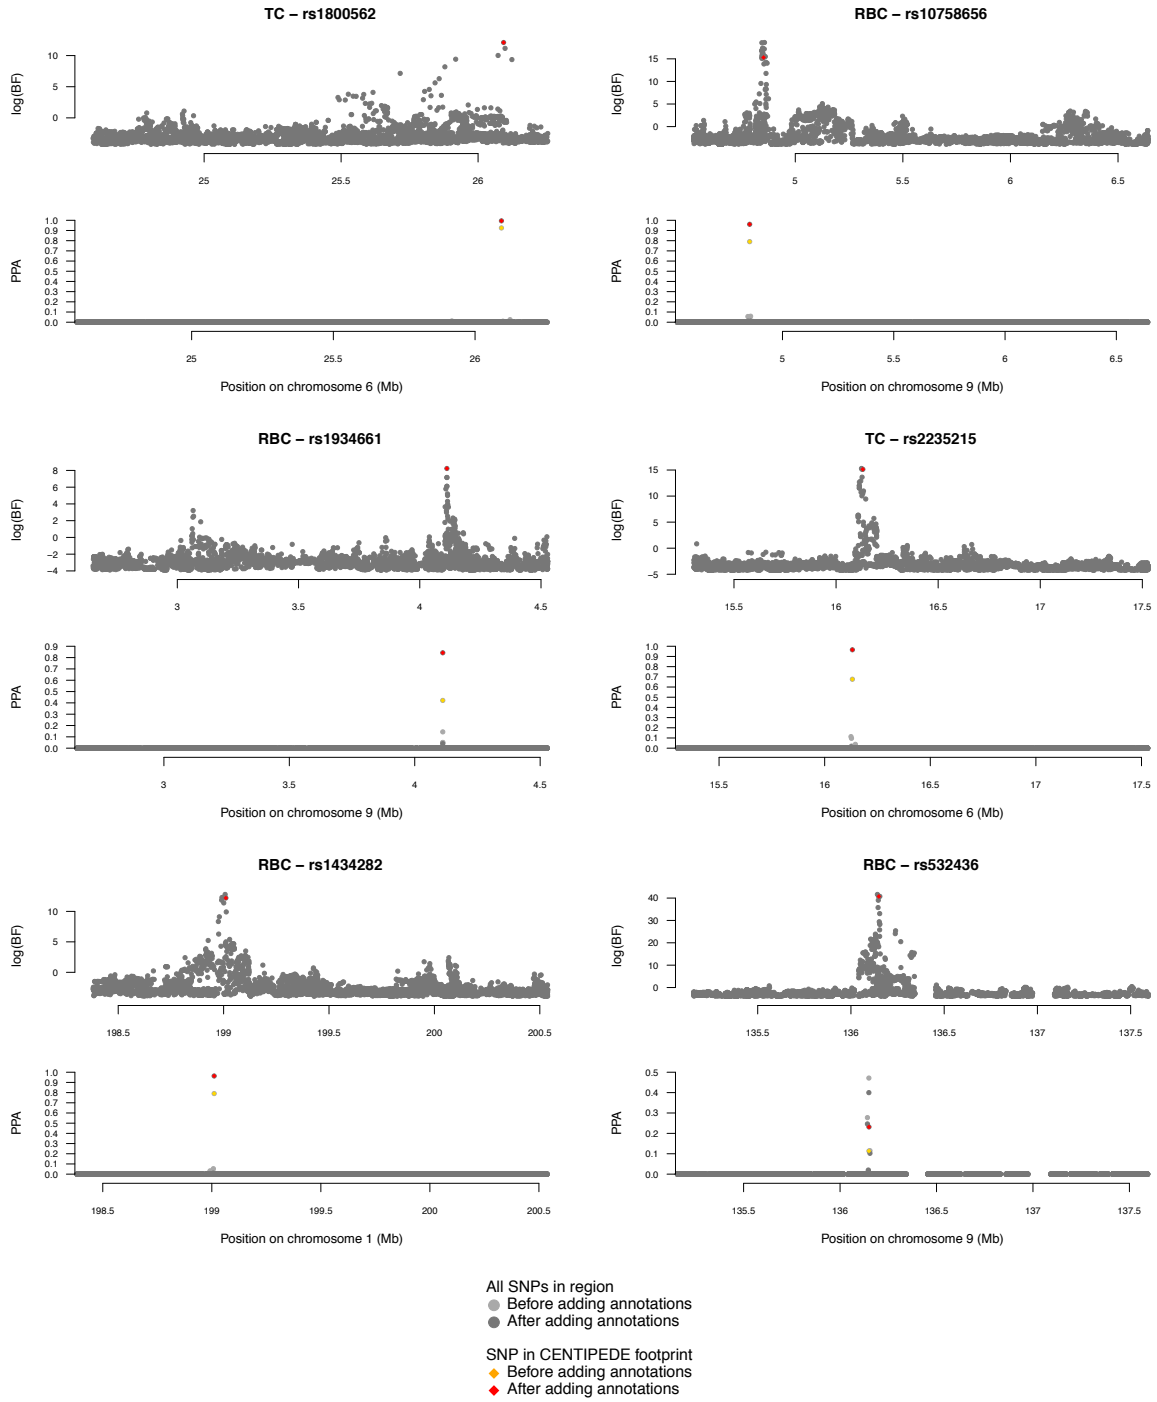

Figure S16 continues to next page . . .

Figure S16 . . . continued from previous page

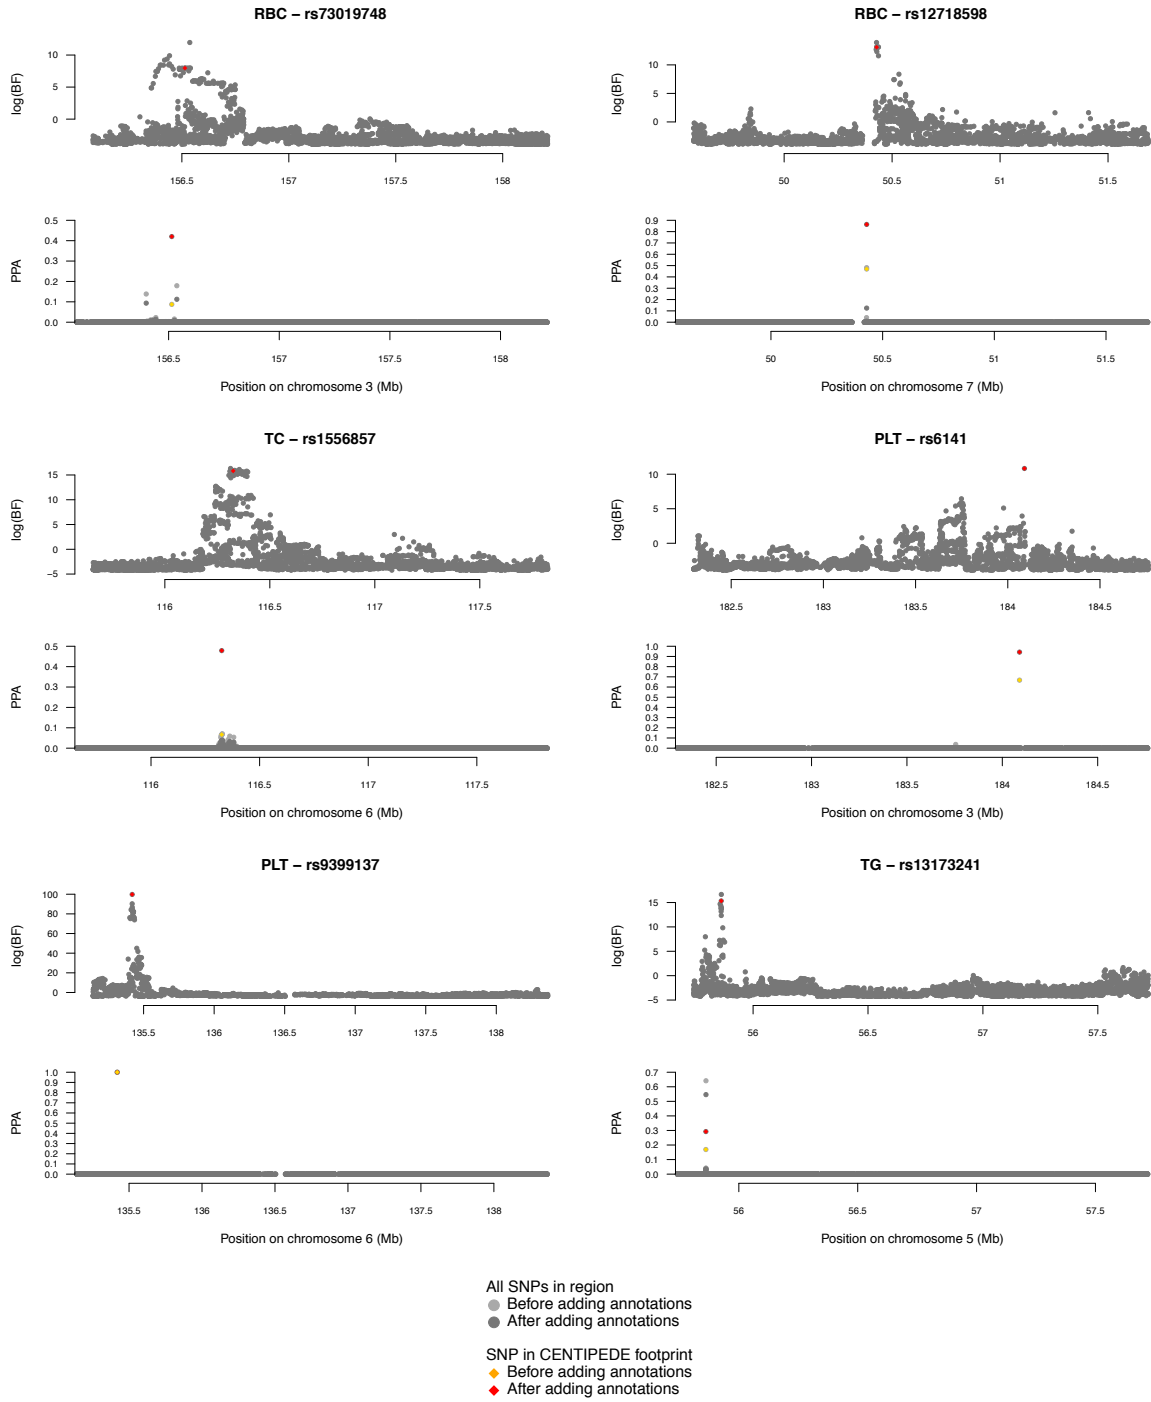

Figure S16 continues to next page . . .

Figure S16 . . . continued from previous page

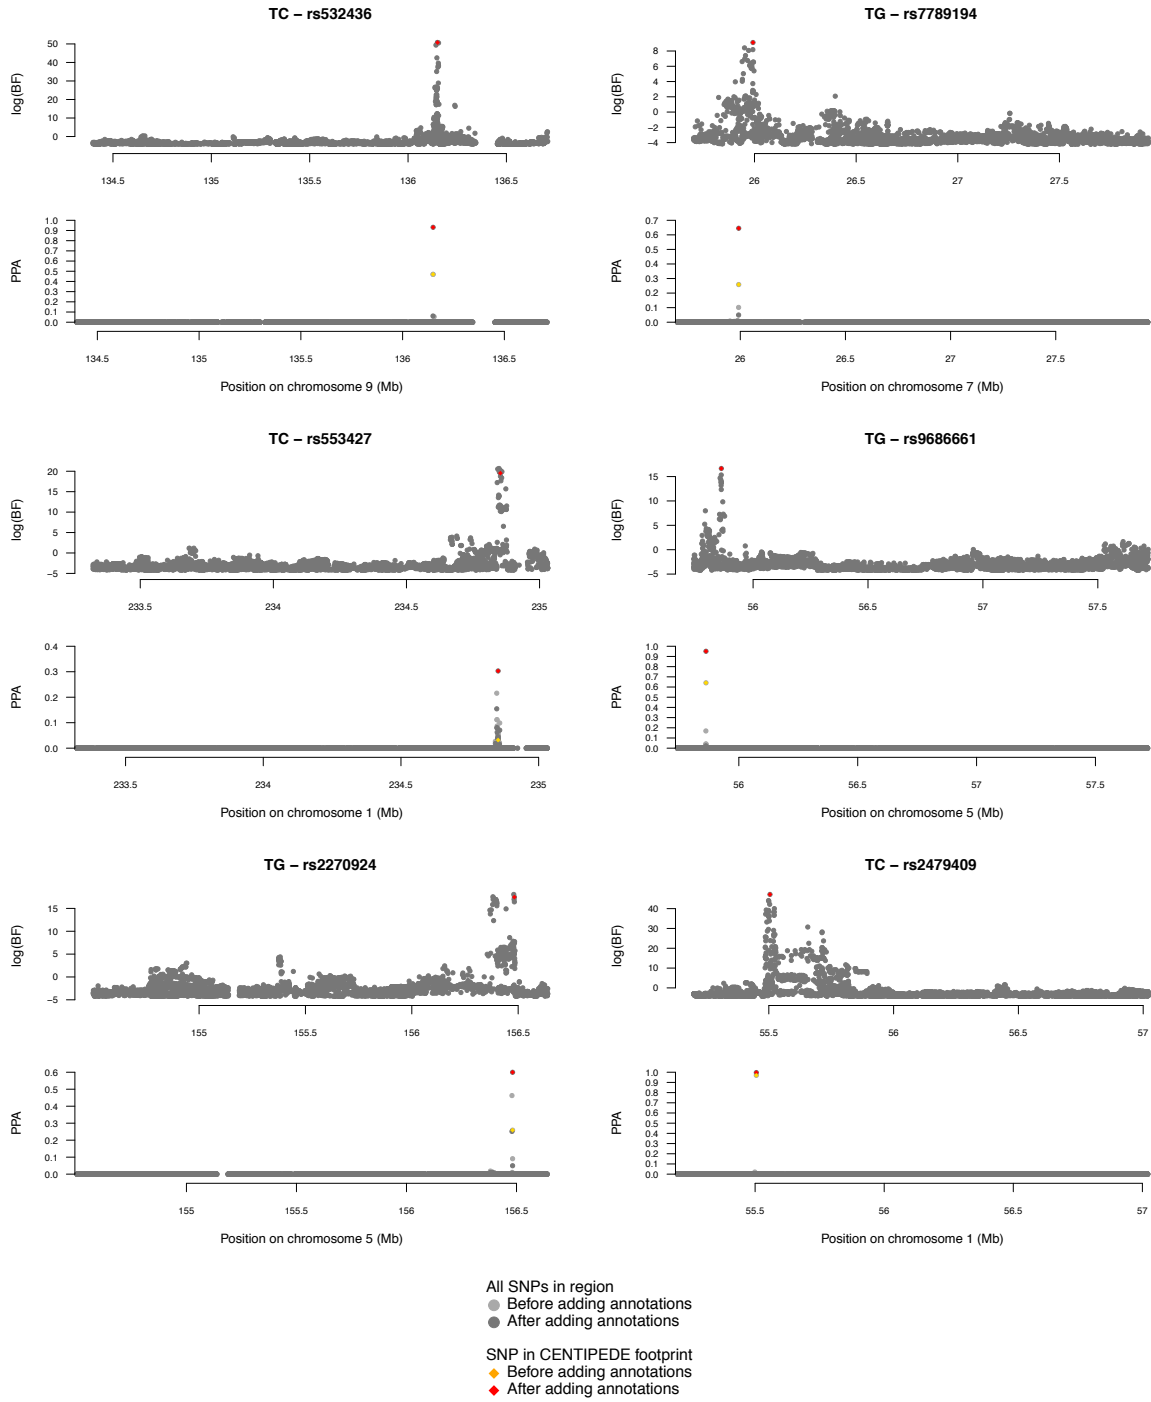

Figure S16 continues to next page . . .
